# Supplementary material
Source: PubMed Central journal article supplement (PMC6778400)
Supplement: NIHMS1052911-supplement-Supplemental_File.pdf [file NIHMS1052911-supplement-Supplemental_File.pdf]

**Table 3.** Effect of current substance use disorders on likelihood of recovery and time to recovery after adjusting for clinical covariates

| <b>Covariates</b>                                                                       | <b>b</b> | <b>Wald</b> | <b>OR</b> | <b>p</b>   | <b>95% CI</b> |
|-----------------------------------------------------------------------------------------|----------|-------------|-----------|------------|---------------|
| <b>Current alcohol use disorder (AUD) model</b>                                         |          |             |           |            |               |
| <i>Logistic regression: Predicting Recovery</i>                                         |          |             |           |            |               |
| Prediction for current AUD                                                              | .81      | 3.92        | 2.24      | <b>.05</b> | 1.01- 4.97    |
| Prediction for current AUD evaluated in the context of each of the following covariates |          |             |           |            |               |
| Cumulative medical burden (n = 243)                                                     | .92      | 4.55        | 2.50      | <b>.03</b> | 1.08 – 5.80   |
| Comorbid anxiety (n = 267)                                                              | .81      | 3.91        | 2.25      | <b>.05</b> | 1.01 – 5.01   |
| Illness duration (n = 250)                                                              | .76      | 3.11        | 2.13      | .08        | .92 – 4.94    |
| Age of bipolar disorder (BD) onset (n = 267)                                            | .84      | 4.19        | 2.31      | <b>.04</b> | 1.04 – 5.16   |
| Number of depressive episodes (n = 231)                                                 | .95      | 4.33        | 2.59      | <b>.04</b> | 1.06 – 6.34   |
| Number of manic episodes (n = 233)                                                      | .79      | 3.26        | 2.21      | .07        | .94 – 5.23    |
| Current depression severity (n = 265)                                                   | .89      | 3.22        | 2.43      | .07        | .92 – 6.40    |
| Current mania severity (n = 265)                                                        | .64      | 2.23        | 1.89      | .14        | .82 – 4.37    |
| <i>Cox Regression: Predicting Time Until Recovery</i>                                   |          |             |           |            |               |
| Prediction for current AUD                                                              | .53      | 6.31        | 1.70      | <b>.01</b> | 1.12 – 2.58   |
| Prediction for current AUD evaluated in the context of each of the following covariates |          |             |           |            |               |
| Cumulative medical burden (n = 231)                                                     | .53      | 5.73        | 1.69      | <b>.02</b> | 1.10 – 2.61   |
| Comorbid anxiety (n = 255)                                                              | .53      | 6.15        | 1.70      | <b>.01</b> | 1.12 – 2.58   |
| Illness duration (n = 240)                                                              | .51      | 5.35        | 1.67      | <b>.02</b> | 1.08 – 2.57   |
| Age of BD onset (n = 255)                                                               | .51      | 5.98        | 1.68      | <b>.01</b> | 1.11 – 2.55   |
| Number of depressive episodes (n = 220)                                                 | .65      | 7.94        | 1.91      | <b>.01</b> | 1.22 – 3.01   |
| Number of manic episodes (n = 222)                                                      | .54      | 5.50        | 1.71      | <b>.02</b> | 1.09 – 2.68   |
| Current depression severity (n = 254)                                                   | .37      | 3.04        | 1.45      | .08        | .96 – 2.19    |
| Current mania severity (n = 253)                                                        | .31      | 2.09        | 1.37      | .15        | .89 – 2.09    |
| <b>Current drug use disorder (DUD) model</b>                                            |          |             |           |            |               |
| <i>Logistic regression: Predicting Recovery</i>                                         |          |             |           |            |               |
| Prediction for current DUD                                                              | 1.13     | 3.93        | 3.10      | <b>.05</b> | 1.01- 9.48    |
| Prediction for current DUD evaluated in the context of each of the following covariates |          |             |           |            |               |

|                                              |      |      |      |            |             |
|----------------------------------------------|------|------|------|------------|-------------|
| Cumulative medical burden (n = 243)          | 1.06 | 3.35 | 2.88 | <b>.07</b> | .93 – 8.92  |
| Comorbid anxiety (n = 267)                   | 1.09 | 3.63 | 2.97 | <b>.06</b> | .97 – 9.10  |
| Illness duration (n = 250)                   | 1.34 | 4.39 | 3.83 | <b>.04</b> | 1.09 -13.4  |
| Age of bipolar disorder (BD) onset (n = 267) | 1.14 | 3.99 | 3.13 | <b>.05</b> | 1.02 – 9.62 |
| Number of depressive episodes (n = 231)      | .86  | 2.18 | 2.37 | .14        | .75 – 7.45  |
| Number of manic episodes (n = 233)           | .90  | 2.39 | 2.46 | .12        | .79 – 7.68  |
| Current depression severity (n = 265)        | 1.02 | 2.12 | 2.77 | .15        | .70- 10.94  |
| Current mania severity (n = 265)             | .98  | 2.45 | 2.67 | .12        | .78 – 9.14  |

*Cox Regression: Predicting Time Until Recovery*

|                                                                                         |     |      |      |            |             |
|-----------------------------------------------------------------------------------------|-----|------|------|------------|-------------|
| Prediction for current DUD                                                              | .59 | 5.26 | 1.81 | <b>.02</b> | 1.09-2.99   |
| Prediction for current DUD evaluated in the context of each of the following covariates |     |      |      |            |             |
| Cumulative medical burden (n = 231)                                                     | .50 | 3.34 | 1.64 | <b>.07</b> | .97 – 2.79  |
| Comorbid anxiety (n = 255)                                                              | .58 | 5.00 | 1.78 | <b>.03</b> | 1.07 – 2.95 |
| Illness duration (n = 240)                                                              | .59 | 5.11 | 1.80 | <b>.02</b> | 1.08 – 2.99 |
| Age of BD onset (n = 255)                                                               | .58 | 5.02 | 1.78 | <b>.03</b> | 1.08 – 2.95 |
| Number of depressive episodes (n = 220)                                                 | .42 | 2.14 | 1.51 | .14        | .87 –2.64   |
| Number of manic episodes (n = 222)                                                      | .37 | 1.83 | 1.45 | .18        | .85 -2.48   |
| Current depression severity (n = 254)                                                   | .09 | .11  | 1.09 | .74        | .65 – 1.85  |
| Current mania severity (n = 253)                                                        | .38 | 2.08 | 1.47 | .15        | .87 – 2.48  |

Current substance use disorder (SUD) model

*Logistic regression: Predicting Recovery*

|                                                                                         |     |      |      |            |            |
|-----------------------------------------------------------------------------------------|-----|------|------|------------|------------|
| Prediction for current SUD                                                              | .81 | 5.03 | 2.25 | <b>.03</b> | 1.11 –4.55 |
| Prediction for current SUD evaluated in the context of each of the following covariates |     |      |      |            |            |

|                                              |     |      |      |            |             |
|----------------------------------------------|-----|------|------|------------|-------------|
| Cumulative medical burden (n = 243)          | .89 | 5.57 | 2.43 | <b>.02</b> | 1.16 – 5.10 |
| Comorbid anxiety (n = 267)                   | .78 | 4.67 | 2.19 | <b>.03</b> | 1.08 – 4.44 |
| Illness duration (n = 250)                   | .85 | 4.84 | 2.35 | <b>.03</b> | 1.10 – 5.02 |
| Age of bipolar disorder (BD) onset (n = 267) | .84 | 5.29 | 2.31 | <b>.02</b> | 1.13 – 4.71 |
| Number of depressive episodes (n = 231)      | .80 | 4.09 | 2.23 | <b>.04</b> | 1.03 – 4.83 |
| Number of hypomanic/manic episodes (n = 233) | .68 | 3.05 | 1.96 | .08        | .92 – 4.19  |
| Current depression severity (n = 265)        | .77 | 2.88 | 2.15 | .09        | .88 – 5.20  |
| Current mania severity (n = 265)             | .64 | 2.70 | 1.89 | .10        | .88 – 4.03  |

*Cox Regression: Predicting Time Until Recovery*

|                                                                                         |     |      |      |            |             |
|-----------------------------------------------------------------------------------------|-----|------|------|------------|-------------|
| Prediction for current SUD                                                              | .54 | 7.70 | 1.71 | <b>.01</b> | 1.17 – 2.49 |
| Prediction for current SUD evaluated in the context of each of the following covariates |     |      |      |            |             |
| Cumulative medical burden (n = 231)                                                     | .53 | 7.01 | 1.70 | <b>.01</b> | 1.15 – 2.52 |
| Comorbid anxiety (n = 255)                                                              | .52 | 7.34 | 1.69 | <b>.01</b> | 1.16 – 2.46 |
| Illness duration (n = 240)                                                              | .53 | 7.13 | 1.70 | <b>.01</b> | 1.15 – 2.52 |
| Age of BD onset (n = 255)                                                               | .52 | 7.22 | 1.68 | <b>.01</b> | 1.15 – 2.45 |
| Number of depressive episodes (n = 220)                                                 | .52 | 6.22 | 1.68 | <b>.01</b> | 1.12 – 2.53 |
| Number of manic episodes (n = 222)                                                      | .41 | 3.98 | 1.51 | <b>.05</b> | 1.01 – 2.27 |
| Current depression severity (n = 254)                                                   | .17 | .77  | 1.19 | .38        | .81 – 1.74  |
| Current mania severity (n = 253)                                                        | .32 | 2.60 | 1.38 | .11        | .93 – 2.03  |

**Table 4.** Moderator Analyses Evaluating Role of SUDs on Likelihood of Recovery and Time Until Recovery in Intensive Psychotherapy Versus Collaborative Care

|                                                         | <i>b</i> | Wald | OR   | <i>p</i> | 95% CI    |
|---------------------------------------------------------|----------|------|------|----------|-----------|
| <b>Past Alcohol Use Disorder (AUD)</b>                  |          |      |      |          |           |
| Logistic Regression: Predicting Recovery                |          |      |      |          |           |
| Treatment Group <sup>a</sup> x Past AUD                 | .07      | .02  | 1.07 | .90      | .40–2.88  |
| Cox Regression: Predicting Time Until Recovery          |          |      |      |          |           |
| Treatment Group <sup>a</sup> x Past AUD                 | -.09     | .08  | .92  | .79      | .49 –1.73 |
| <b>Current AUD</b>                                      |          |      |      |          |           |
| Logistic Regression: Predicting Recovery                |          |      |      |          |           |
| Treatment Group <sup>a</sup> x Current AUD              | .09      | .013 | 1.10 | .91      | .22 –5.49 |
| Cox Regression: Predicting Time Until Recovery          |          |      |      |          |           |
| Treatment Group <sup>a</sup> x Current AUD              | -.07     | .03  | .93  | .87      | .40 –2.17 |
| <b>Past Drug Use Disorder (DUD)</b>                     |          |      |      |          |           |
| Logistic Regression: Predicting Recovery                |          |      |      |          |           |
| Treatment Group <sup>a</sup> x Current DUD              | .40      | .54  | 1.49 | .46      | .52 –4.25 |
| Cox Regression: Predicting Time Until Recovery          |          |      |      |          |           |
| Treatment Group <sup>a</sup> x Current DUD              | .32      | .84  | 1.38 | .36      | .70 –2.73 |
| <b>Current DUD</b>                                      |          |      |      |          |           |
| Logistic Regression: Predicting Recovery                |          |      |      |          |           |
| Treatment Group <sup>a</sup> x Current DUD              | 1.25     | .95  | 3.50 | .33      | .28 –43.7 |
| Cox Regression: Predicting Time Until Recovery          |          |      |      |          |           |
| Treatment Group <sup>a</sup> x Current DUD              | .46      | .73  | 1.58 | .39      | .55 –4.53 |
| <b>Past Substance Use Disorder (SUD)<sup>b</sup></b>    |          |      |      |          |           |
| Logistic Regression: Predicting Recovery                |          |      |      |          |           |
| Treatment Group <sup>a</sup> x Past SUD <sup>b</sup>    | .22      | .20  | 1.25 | .66      | .47 –3.36 |
| Cox Regression: Predicting Time Until Recovery          |          |      |      |          |           |
| Treatment Group <sup>a</sup> x Past SUD <sup>b</sup>    | -.06     | .03  | .94  | .85      | .50–1.78  |
| <b>Current SUD<sup>b</sup></b>                          |          |      |      |          |           |
| Logistic Regression: Predicting Recovery                |          |      |      |          |           |
| Treatment Group <sup>a</sup> x Current SUD <sup>b</sup> | .26      | .13  | 1.30 | .72      | .31 –5.46 |
| Cox Regression: Predicting Time Until Recovery          |          |      |      |          |           |
| Treatment Group <sup>a</sup> x Current SUD <sup>b</sup> | -.03     | .005 | .97  | .94      | .45 –2.09 |

\*Logistic regression analyses include 270 participants and Cox regression analyses include 258 participants. Fewer cases are included in the Cox analyses due to “censored cases before the earliest event in a stratum”

<sup>a</sup>Treatment Group = intensive psychotherapy (1) vs. collaborative care (0)

<sup>b</sup>SUD includes AUD and DUD
